# Supplementary material for: Seasonality in risk of pandemic influenza emergence
Source: PLOS journal article supplement (doi:10.1371/journal.pcbi.1005749), 2017-10-19

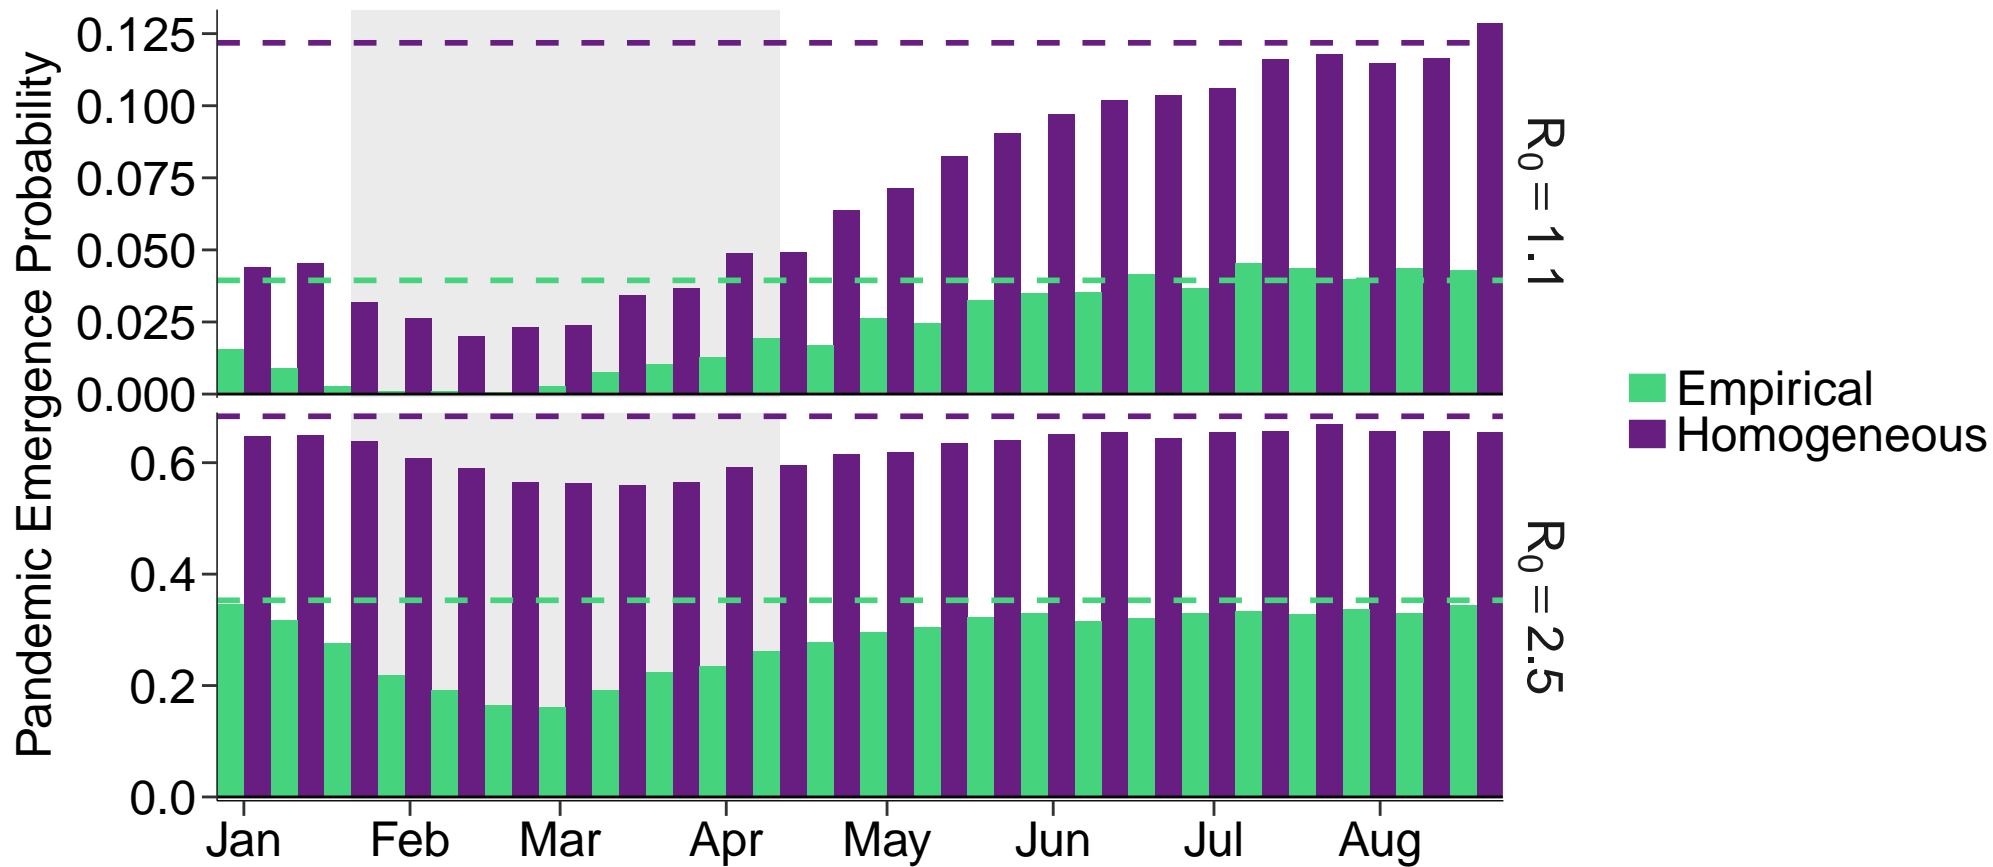

Supplement: S9 (10.1371/journal.pcbi.1005749.s009) [file journal.pcbi.1005749.s009]
